# Supplementary material for: Risk factors for fecal carriage of drug-resistant Escherichia coli: a systematic review and meta-analysis
Source: PubMed Central journal article supplement (PMC7014593; doi:10.1186/s13756-020-0691-3), 2020-02-11

A

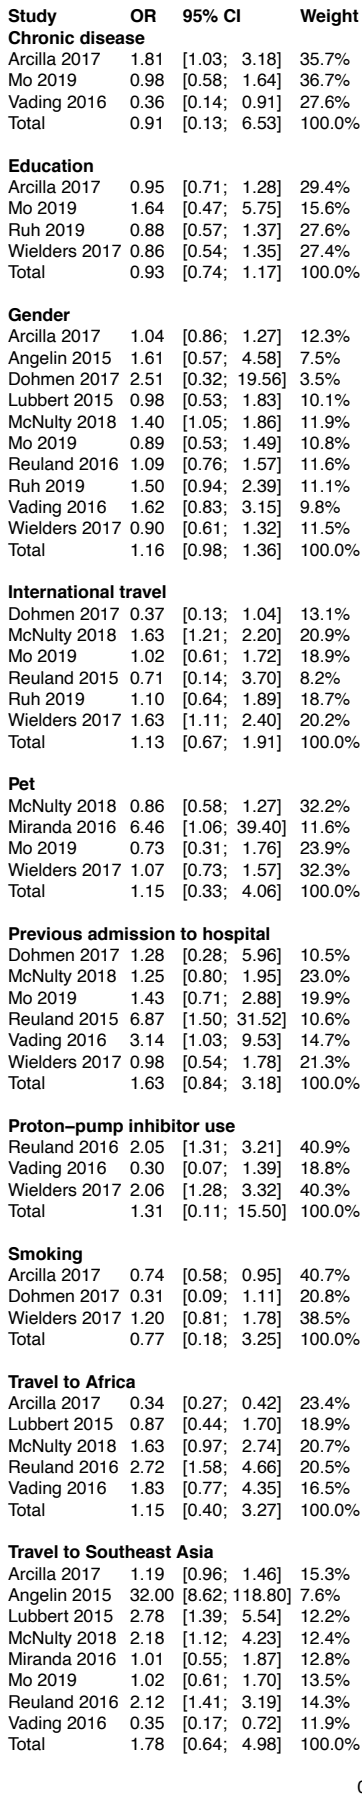

B

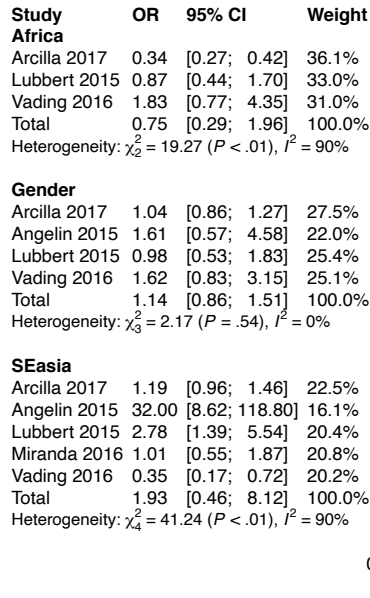

C

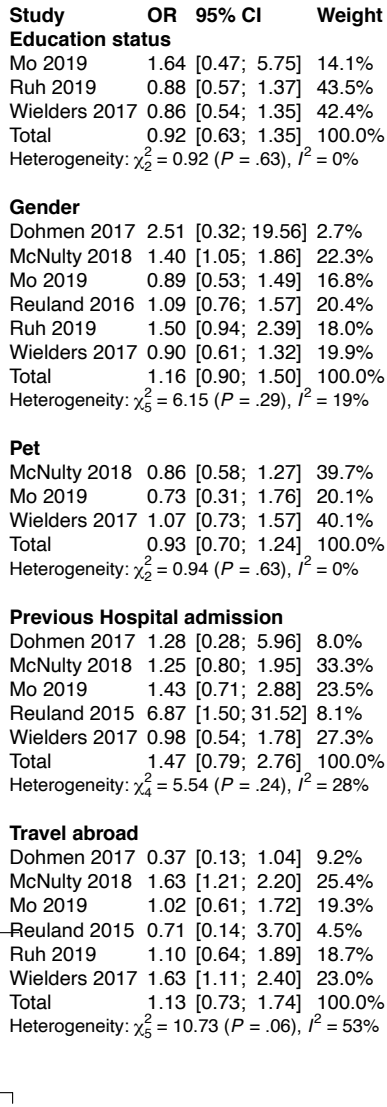

Supplement: 13756_2020_691_MOESM1_ESM.pdf [file 13756_2020_691_MOESM1_ESM.pdf]
